# Supplementary material
Source: PubMed Central journal article supplement (PMC6223613)
Supplement: NIHMS988268-supplement-1.pdf [file NIHMS988268-supplement-1.pdf]

Related to Figure 7. 129 mice were administered heat-killed or live *Bacteroides* spp. 7 days prior to infection with *S. Typhimurium*. Mice were sacrificed at 2 days post-infection for flow cytometry analysis. Single-cell suspensions were stained with antibodies. Cells were gated on forward and side scatter to exclude debris and select for single cells. A hierarchical gating strategy was used on live cells to identify B cells, T cells, NK cells, dendritic cells, mononucleocytes, and neutrophils as depicted.

## Supplemental Tables

**Table S1. Bacteroidales spp. identified as predictive features of B6N microbiotas by supervised learning analyses.** Related to Figure 3. Analysis metrics include mean decrease in accuracy of predictive algorithm when each taxonomic group is removed from analysis and rank of predictive power. F=family, G=genus, S=species.

| Taxonomy                   | FMT experiment            |                          | Cohousing experiment      |                          |
|----------------------------|---------------------------|--------------------------|---------------------------|--------------------------|
|                            | Mean decrease in accuracy | Rank of predictive power | Mean decrease in accuracy | Rank of predictive power |
| <i>Bacteroides</i> (G)     | 0.051                     | 2                        | 0.048                     | 2                        |
| <i>B. acidifaciens</i> (S) | 0.061                     | 1                        | 0.032                     | 7                        |
| <i>B. ovatus</i> (S)       | 0.022                     | 6                        | 0.012                     | 11                       |
| <i>B. uniformis</i> (S)    | 0.0052                    | 14                       | 0.0074                    | 13                       |
| <i>Prevotella</i> (G)      | 0.0075                    | 10                       | 0.045                     | 4                        |
| Rikenellaceae (F)          | $1.6 \times 10^{-5}$      | 61                       | 0.048                     | 1                        |
| S24-7 (F)                  | 0.0002                    | 41                       | $4.0 \times 10^{-5}$      | 56                       |
| <i>Odoribacter</i> (G)     | 0.0003                    | 39                       | 0.047                     | 3                        |

**Table S2: Primers utilized in this study.** Related to STAR Methods.

|                                       |                                    |
|---------------------------------------|------------------------------------|
| Mouse <i>Nramp1</i> F primer          | 5'-AAGTGACATCTCGCCATAGGTGCC-3'     |
| Mouse <i>Nramp1</i> R primer          | 5'- TTCTCTCACCATAGTTATCCAAG AAG-3' |
| Mouse <i>Nramp1</i> sequencing primer | 5'-CCCCCATCTATGTTATCACCC-3'        |
| Mouse <i>GAPDH</i> qPCR F primer      | 5'-ACAGTCCATGCCATCACTGCC-3'        |
| Mouse <i>GAPDH</i> qPCR R primer      | 5'-GCCTGCTTCACCACCTTCTTG-3'        |
| Mouse pan- <i>Defa</i> qPCR F primer  | 5'-GGTGATCATCAGACCCCAGCATCAGT-3'   |
| Mouse pan- <i>Defa</i> qPCR R primer  | 5'-AAGAGACTAAACTGAGGAGCAGC-3'      |
| Mouse <i>mBD3</i> qPCR F primer       | 5'-GCTAGGGAGCACTTGTTTGC-3'         |
| Mouse <i>mBD3</i> qPCR R primer       | 5'-TTGTTTGAGGAAAGGAGGCA-3'         |
| Mouse <i>Ang4</i> qPCR F primer       | 5'-CTCTGGCTCAGAATCTAAGGTACGA -3'   |

|                                                    |                                  |
|----------------------------------------------------|----------------------------------|
| Mouse <i>Ang4</i> qPCR R primer                    | 5'-GAAATCTTTAAAGGCTCGGTACCC -3'  |
| Mouse <i>RegIIIβ</i> qPCR F primer                 | 5'-CTGCCTTAGACCGTGCTTTC-3'       |
| Mouse <i>RegIIIβ</i> qPCR R primer                 | 5'-ATAGGGCAACTTCACCTCAC-3'       |
| Mouse <i>RegIIIγ</i> qPCR F primer                 | 5'-CGTGCCTATGGCTCCTATTGCT-3'     |
| Mouse <i>RegIIIγ</i> qPCR R primer                 | 5'-TTCAGCGCCACTGAGCACAGAC-3'     |
| Mouse TNFα qPCR F primer                           | 5'-GATCGGTCCCCAAAGGGATG-3'       |
| Mouse TNFα qPCR R primer                           | 5'-TGGTTTGTGAGTGTGAGGGTC-3'      |
| Mouse IL-6 qPCR F primer                           | 5'-TCCAGTTGCCTTCTTGGGAC-3'       |
| Mouse IL-6 qPCR R primer                           | 5'-AGTCTCCTCTCCGGACTTGT-3'       |
| Mouse IL-1β qPCR F primer                          | 5'-AGCTTCCTTGTGCAAGTGTCT-3'      |
| Mouse IL-1β qPCR R primer                          | 5'-GACAGCCCAGGTCAAAGGTT-3'       |
| Mouse IFNγ qPCR F primer                           | 5'-AGCGGCTGACTGAACTCAGATTGTAG-3' |
| Mouse IFNγ qPCR R primer                           | 5'-GTCACAGTTTTTCAGCTGTATAGGG-3'  |
| Universal 16S rRNA 63F PCR primer                  | 5'-CAGGCCTAACACATGCAAGTC-3'      |
| Universal 16S rRNA 1387R PCR primer                | 5'-GCCCGGGAACGTATTCACCG-3'       |
| <i>B. thetaiotamicron</i> pNBU2 insertion site 1 F | 5'-TATCCTATTCTTTAGAGCGAC-3'      |
| <i>B. thetaiotamicron</i> pNBU2 insertion site 1 R | 5'-GGTGTACCTGGCATTGAAGG-3'       |
| <i>B. thetaiotamicron</i> pNBU2 insertion site 2 F | 5'-CCTTTGCACCGCTTTCAACG-3'       |
| <i>B. thetaiotamicron</i> pNBU2 insertion site 2 R | 5'-TCAACTAAACATGAGATACTAGC-3'    |
